# Supplementary material for: State Trends of Cannabis Liberalization as a Causal Driver of Increasing Testicular Cancer Rates across the USA
Source: MDPI journal article supplement (doi:10.3390/ijerph191912759), 2022-10-05
Supplement: s1 [file s1]

Supplementary Table S1.: Testicular Cancer Rates USA by State and Year 2001 – 2017.

| State         | Year |      |      |             |      |      |      |      |      |      |      |      |      |      |      |      |      |
|---------------|------|------|------|-------------|------|------|------|------|------|------|------|------|------|------|------|------|------|
|               | 2001 | 2002 | 2003 | 2004        | 2005 | 2006 | 2007 | 2008 | 2009 | 2010 | 2011 | 2012 | 2013 | 2014 | 2015 | 2016 | 2017 |
| Alaska        | 3.9  | 4.3  | 3.3  | 3           | 3.5  | 3.2  | 2.4  | 3.2  | 2.8  | 3.9  | 3.5  | 3    | 3.1  | 4.1  | 4.3  | 3.1  | 2.7  |
| Alabama       | 2    | 2.2  | 1.9  | 2.4         | 2.4  | 2    | 2.3  | 2.7  | 2.4  | 2.5  | 2    | 2.1  | 2.2  | 2.6  | 2.1  | 2    | 2.1  |
| Arkansas      | 2.2  | 1.8  | 2.8  | 2.1         | 2.3  | 1.9  | 2.3  | 2.1  | 2.5  | 2.4  | 2.1  | 2.6  | 2.5  | 3.1  | 2.3  | 2.9  | 2.7  |
| Arizona       | 2.6  | 2.7  | 2.8  | 2.8         | 2.9  | 3.2  | 2.7  | 3    | 3.1  | 2.8  | 3    | 2.9  | 2.4  | 2.8  | 2.9  | 2.8  | 2.8  |
| California    | 2.7  | 2.6  | 2.7  | 2.8         | 2.8  | 2.9  | 2.9  | 3    | 3    | 3.1  | 2.9  | 3    | 3.1  | 3.2  | 3.1  | 3.2  | 3.2  |
| Colorado      | 3    | 3.1  | 3.4  | 3.2         | 3.1  | 2.9  | 3.2  | 3.3  | 3.2  | 3.3  | 2.8  | 3    | 2.9  | 3.1  | 3.2  | 2.8  | 3    |
| Connecticut   | 2.8  | 3.3  | 3    | 3.5         | 3    | 3.2  | 3.7  | 3    | 3.4  | 2.9  | 3.3  | 3.4  | 3.5  | 3.7  | 2.4  | 3.7  | 3.3  |
| Delaware      | 2.9  | 2    | 2.5  | <b>2.65</b> | 2.8  | 2.5  | 2.8  | 2.5  | 3    | 3    | 2    | 2.9  | 3.8  | 2.6  | 2.6  | 2.5  | 1.8  |
| Florida       | 2.8  | 2.6  | 2.8  | 2.5         | 2.8  | 2.9  | 2.6  | 2.7  | 2.6  | 2.4  | 2.4  | 2.7  | 2.6  | 2.4  | 2.4  | 2.7  | 2.4  |
| Georgia       | 2.2  | 2.2  | 2.2  | 2.1         | 1.9  | 2.1  | 2.1  | 2.3  | 2.1  | 2    | 2.1  | 2    | 2.1  | 2.2  | 2.1  | 2.4  | 2.2  |
| Hawaii        | 2.5  | 2.1  | 2.3  | 2.3         | 3.3  | 2.6  | 2.9  | 3.4  | 3.5  | 2.6  | 2.3  | 2.8  | 2.7  | 3.3  | 3.3  | 3.4  | 2.7  |
| Idaho         | 2.9  | 3    | 3.5  | 4.3         | 3.9  | 3.2  | 3.1  | 3.4  | 3.4  | 2.9  | 4.5  | 3    | 2.9  | 4.3  | 4    | 3.9  | 3    |
| Illinois      | 2.7  | 2.8  | 2.7  | 2.8         | 2.7  | 2.9  | 2.7  | 3    | 2.9  | 3.1  | 2.8  | 3.1  | 3.1  | 3    | 3.3  | 3.4  | 3.1  |
| Indiana       | 3.1  | 2.6  | 3.2  | 2.8         | 2.5  | 2.7  | 3    | 2.8  | 2.7  | 2.9  | 2.9  | 2.6  | 3.3  | 3.2  | 3.4  | 3.2  | 2.5  |
| Iowa          | 3.9  | 3.3  | 3.3  | 3.5         | 3.8  | 3.3  | 3.3  | 3.4  | 3.5  | 3.9  | 3.9  | 3.2  | 3.5  | 3.6  | 4.1  | 3.6  | 4    |
| Kansas        | 2.6  | 2.3  | 2.7  | 2.8         | 3.4  | 2.9  | 3.1  | 3.2  | 3.5  | 2.9  | 2.8  | 3.9  | 2.9  | 3.7  | 3.5  | 3.1  | 3.1  |
| Kentucky      | 2.8  | 2.8  | 2.3  | 2.4         | 2.8  | 2.7  | 2.3  | 3    | 2.7  | 3.1  | 3    | 2.6  | 2.9  | 3    | 2.8  | 3    | 3    |
| Louisiana     | 2.4  | 2.2  | 2.3  | 2.6         | 2.2  | 2.1  | 2.2  | 2.2  | 2.5  | 2.3  | 2    | 2.7  | 2.3  | 3    | 2.2  | 2.3  | 2.4  |
| Massachusetts | 3.1  | 3.5  | 3.2  | 3           | 3.6  | 3.2  | 3.4  | 3.1  | 3.5  | 2.8  | 3.4  | 3.4  | 3.4  | 3.3  | 3.1  | 2.8  | 2.7  |
| Maryland      | 2.2  | 2.6  | 2.5  | 1.9         | 2.2  | 2.1  | 2.3  | 2.3  | 2.2  | 2.1  | 2.3  | 2.6  | 2.4  | 2.3  | 2.4  | 2.3  | 2.3  |
| Maine         | 3.1  | 3.2  | 3.6  | 3.1         | 3.8  | 3.1  | 3.1  | 3.5  | 3.1  | 4.3  | 3.5  | 3.2  | 3.8  | 3    | 3.6  | 3.8  | 4.2  |
| Michigan      | 3    | 2.9  | 2.9  | 3.2         | 3.2  | 2.9  | 3.1  | 2.8  | 2.6  | 3.2  | 3    | 3    | 3.3  | 3    | 3    | 2.9  | 3.1  |
| Minnesota     | 3.8  | 3.8  | 3.8  | 3.5         | 4    | 3    | 3.9  | 3.3  | 4    | 3.4  | 3.6  | 3.7  | 3.7  | 3.4  | 3.7  | 3.5  | 3.5  |
| Missouri      | 3    | 2.6  | 2.5  | 2.7         | 2.8  | 2.6  | 2.2  | 2.7  | 2.7  | 2.8  | 2.5  | 2.6  | 3    | 2.4  | 3.2  | 2.8  | 2.8  |

|                |            |             |             |             |            |            |     |            |            |     |     |             |     |     |             |     |     |
|----------------|------------|-------------|-------------|-------------|------------|------------|-----|------------|------------|-----|-----|-------------|-----|-----|-------------|-----|-----|
| Mississippi    | <b>1.7</b> | <b>1.5</b>  | 1.3         | 2.2         | 2          | 1.8        | 2   | 1.9        | 1.5        | 2.3 | 1.6 | 2.1         | 1.7 | 2.1 | 1.8         | 2.1 | 2.4 |
| Montana        | 2.8        | 3.7         | 3.8         | 2.9         | 3.7        | 3          | 2.7 | 3.7        | 2.4        | 5.6 | 3.8 | 4.1         | 3.4 | 3.6 | 4.3         | 3.8 | 3.5 |
| North Carolina | 2.7        | 2.3         | 2.4         | 2.6         | 2.5        | 2.8        | 2.6 | 2.5        | 2.8        | 2.3 | 2.5 | 2.4         | 2.6 | 2.3 | 2.7         | 2.9 | 2.6 |
| North Dakota   | 3.7        | 3.1         | 2.7         | 4           | 2.9        | 3.4        | 2.9 | 3.2        | 5          | 3.7 | 2.6 | <b>3.1</b>  | 3.6 | 4.2 | 3.4         | 4.4 | 3.8 |
| Nebraska       | 4          | 2.6         | 3.7         | 3.3         | 3.2        | 3.2        | 3.9 | 3.3        | 3.4        | 3.3 | 3.4 | 3.6         | 3.6 | 4.5 | 3.2         | 4.1 | 3.3 |
| New Hampshire  | 3.7        | 3.2         | 4           | 4.1         | 3.1        | 4.3        | 3.8 | 3.8        | 4.1        | 4.1 | 3.8 | 4.3         | 4.7 | 2.4 | 3.7         | 4.1 | 3.9 |
| New Jersey     | 3.2        | 3.2         | 3           | 3.2         | 2.6        | 2.9        | 3   | 2.8        | 3          | 3   | 3.1 | 3           | 3.2 | 2.9 | 3.1         | 3   | 3.1 |
| New Mexico     | 3.2        | 3.5         | 2.8         | 2.6         | 3.5        | 3.3        | 3.1 | 3.5        | 3          | 3.3 | 3.4 | 2.9         | 3.8 | 3.5 | 3.4         | 3.2 | 3.3 |
| Nevada         | 2.4        | 2           | 3.3         | 2.6         | 2.7        | 2.8        | 2.4 | 2.4        | 2.8        | 2.5 | 2.4 | 2.7         | 2.3 | 2.7 | 2.3         | 3.5 | 3.5 |
| New York       | 2.6        | 2.5         | 2.8         | 2.8         | 2.9        | 2.8        | 3   | 3.1        | 2.9        | 3   | 3   | 3.2         | 2.9 | 3   | 2.9         | 3.1 | 3.1 |
| Ohio           | 3          | 2.9         | 2.7         | 3           | 3.4        | 2.7        | 2.9 | 2.8        | 2.9        | 2.6 | 3   | 2.8         | 2.8 | 3.2 | 3.2         | 2.8 | 2.7 |
| Oklahoma       | 2.3        | 2.4         | 3.2         | 2.6         | 2.7        | 2.6        | 2.5 | 2.8        | 2.7        | 2.5 | 3   | 2.3         | 2.8 | 3.1 | 2.6         | 3.2 | 2.3 |
| Oregon         | 4.1        | 3.7         | 3.5         | 3.4         | 3.3        | 3.2        | 3.8 | 3.5        | 3.1        | 3.2 | 3.6 | 3.2         | 3.7 | 3.9 | 3.6         | 3.3 | 3.2 |
| Pennsylvania   | 3.2        | 3.3         | 2.9         | 3.6         | 3.2        | 3.3        | 3   | 3.4        | 3.4        | 3.8 | 3.3 | 3.5         | 3.4 | 3.2 | 3.4         | 3.6 | 2.9 |
| Rhode Island   | 3          | 2.9         | 2.4         | 3.8         | 3.4        | 1.9        | 3.7 | 3.9        | 2.8        | 3.2 | 4.1 | 4.1         | 3.6 | 1.9 | 4.3         | 2.8 | 3.1 |
| South Carolina | 2          | 1.8         | 2.4         | 1.8         | 2.1        | 2.3        | 1.9 | 2.3        | 2          | 2.1 | 2.3 | 2.3         | 2.1 | 2.2 | 2.1         | 2.2 | 2   |
| South Dakota   | 3.5        | 3.7         | 3.7         | 2.6         | 4.4        | 2.8        | 2.6 | 3.8        | 2.5        | 3.4 | 2.6 | 3.3         | 4   | 4.4 | 3.2         | 2.5 | 2.4 |
| Tennessee      | 2          | 1.9         | 2.1         | 2.3         | 2.9        | 2.4        | 2.5 | 2.6        | 2.3        | 2.4 | 2.6 | 2.5         | 2.9 | 2.8 | 2.5         | 2.9 | 3   |
| Texas          | 2.5        | 2.5         | 2.7         | 2.6         | 2.6        | 2.7        | 2.5 | 2.7        | 2.5        | 2.5 | 2.4 | 2.5         | 2.7 | 2.6 | 2.6         | 2.7 | 2.8 |
| Utah           | 2.8        | 4           | 4.1         | 4.4         | 3.1        | 3          | 4.4 | 3.7        | 3.7        | 3.7 | 3.4 | 3.7         | 3.7 | 3.4 | 3.8         | 3.9 | 4.4 |
| Virginia       | 2          | 2.2         | 2.3         | 2.5         | 2.9        | 2.5        | 2.5 | 2.5        | 2.2        | 2.5 | 2.2 | 2           | 2.2 | 2.2 | 2.1         | 2.3 | 2.3 |
| Vermont        | 4.8        | 3.1         | 2.8         | 4.8         | <b>3.9</b> | 3          | 3.6 | 3.5        | 3.9        | 2.8 | 3.8 | <b>4.25</b> | 4.7 | 3.6 | <b>4.05</b> | 4.5 | 3.8 |
| Washington     | 3.4        | 3.3         | 3.2         | 3.3         | 3.6        | 3.8        | 3.2 | 3.2        | 3.8        | 3.4 | 3.5 | 3.7         | 3.4 | 4   | 3.1         | 3.6 | 3.2 |
| Wisconsin      | 3.3        | 3.5         | 3.5         | 3.7         | 3.7        | 3.6        | 3.7 | 3.3        | 3.5        | 3.9 | 3.6 | 3.8         | 3.3 | 3.7 | 3.7         | 3.9 | 3.4 |
| West Virginia  | 2.1        | 2.4         | 3           | 2.5         | 3          | 2.6        | 3.1 | 2.9        | 3.2        | 3.5 | 2.8 | 3.6         | 2.9 | 2.8 | 3           | 2.7 | 2.7 |
| Wyoming        | 4.3        | <b>4.23</b> | <b>4.15</b> | <b>4.08</b> | 4          | <b>3.7</b> | 3.4 | <b>3.4</b> | <b>3.4</b> | 3.4 | 4.2 | 3           | 5.7 | 3.3 | 3.5         | 4.1 | 4.4 |

Supplementary Table S1. State based CDC age-adjusted testicular cancer rates 2001-2017 as raw data with temporally kriged data marked in bold and red typeface.

**Supplementary Table S2.: States in Each Cannabis Use Quintile**

| State          | Quintile 1 | Quintile 2 | Quintile 3 | Quintile 4 | Quintile 5 |
|----------------|------------|------------|------------|------------|------------|
| Alabama        | 14         | 1          | 0          | 0          | 0          |
| Alaska         | 0          | 0          | 0          | 0          | 15         |
| Arizona        | 0          | 3          | 7          | 5          | 0          |
| Arkansas       | 0          | 6          | 9          | 0          | 0          |
| California     | 0          | 0          | 0          | 15         | 0          |
| Colorado       | 0          | 0          | 0          | 1          | 14         |
| Connecticut    | 0          | 0          | 2          | 12         | 1          |
| Delaware       | 0          | 0          | 6          | 9          | 0          |
| Florida        | 0          | 0          | 14         | 1          | 0          |
| Georgia        | 2          | 3          | 8          | 2          | 0          |
| Hawaii         | 0          | 1          | 4          | 8          | 2          |
| Idaho          | 6          | 9          | 0          | 0          | 0          |
| Illinois       | 0          | 2          | 13         | 0          | 0          |
| Indiana        | 0          | 1          | 2          | 12         | 0          |
| Iowa           | 14         | 1          | 0          | 0          | 0          |
| Kansas         | 4          | 11         | 0          | 0          | 0          |
| Kentucky       | 0          | 7          | 7          | 1          | 0          |
| Louisiana      | 7          | 8          | 0          | 0          | 0          |
| Maine          | 0          | 0          | 0          | 0          | 15         |
| Maryland       | 2          | 3          | 1          | 9          | 0          |
| Massachusetts  | 0          | 0          | 0          | 3          | 12         |
| Michigan       | 0          | 0          | 0          | 15         | 0          |
| Minnesota      | 0          | 3          | 7          | 4          | 1          |
| Mississippi    | 14         | 1          | 0          | 0          | 0          |
| Missouri       | 0          | 0          | 14         | 1          | 0          |
| Montana        | 0          | 0          | 0          | 0          | 15         |
| Nebraska       | 9          | 4          | 2          | 0          | 0          |
| Nevada         | 0          | 0          | 4          | 9          | 2          |
| New Hampshire  | 0          | 0          | 0          | 0          | 15         |
| New Jersey     | 8          | 7          | 0          | 0          | 0          |
| New Mexico     | 0          | 0          | 0          | 15         | 0          |
| New York       | 0          | 0          | 0          | 15         | 0          |
| North Carolina | 0          | 11         | 4          | 0          | 0          |
| North Dakota   | 15         | 0          | 0          | 0          | 0          |
| Ohio           | 0          | 0          | 13         | 2          | 0          |
| Oklahoma       | 10         | 4          | 1          | 0          | 0          |
| Oregon         | 0          | 0          | 0          | 0          | 15         |
| Pennsylvania   | 0          | 2          | 12         | 1          | 0          |
| Rhode Island   | 0          | 0          | 0          | 0          | 15         |
| South Carolina | 4          | 6          | 5          | 0          | 0          |

|               |    |    |   |   |    |
|---------------|----|----|---|---|----|
| South Dakota  | 7  | 7  | 1 | 0 | 0  |
| Tennessee     | 1  | 8  | 4 | 2 | 0  |
| Texas         | 15 | 0  | 0 | 0 | 0  |
| Utah          | 15 | 0  | 0 | 0 | 0  |
| Vermont       | 0  | 0  | 0 | 0 | 15 |
| Virginia      | 2  | 8  | 4 | 1 | 0  |
| Washington    | 0  | 0  | 0 | 2 | 13 |
| West Virginia | 1  | 12 | 2 | 0 | 0  |
| Wisconsin     | 0  | 14 | 1 | 0 | 0  |
| Wyoming       | 6  | 6  | 2 | 1 | 0  |

Supplementary Table S2. State composition of each quintile.

# *Figure S1 - States in US Testicular Cancer Dataset*

A

Last Month Cannabis Use 2017

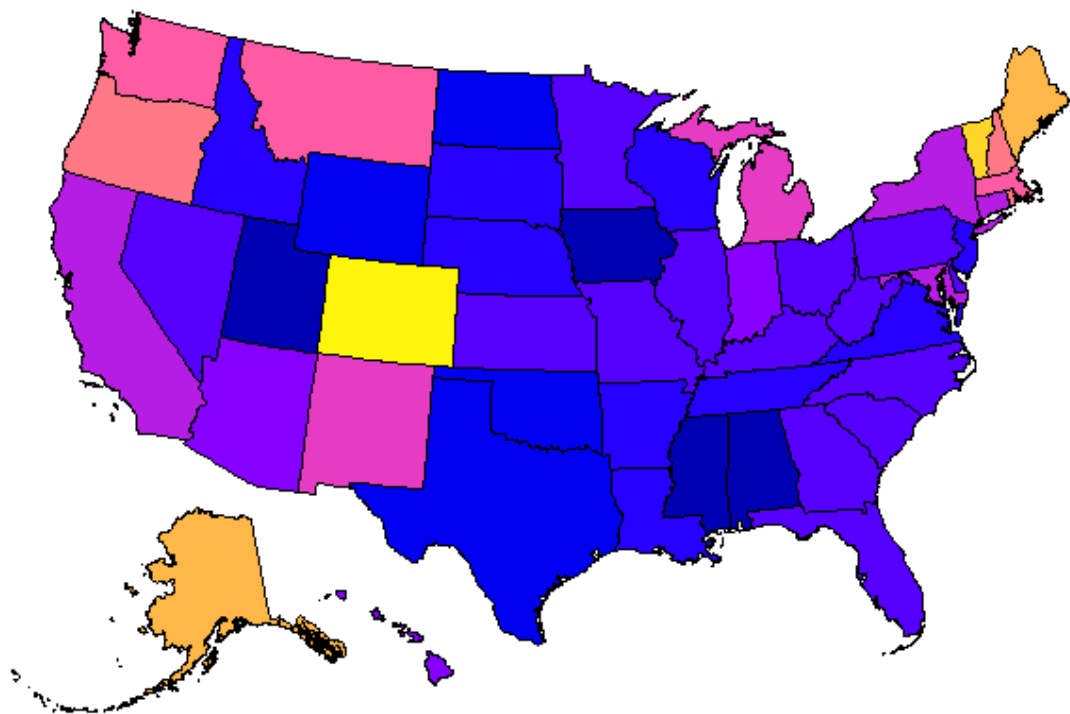

B

US Testicular Cancer Rates 2017

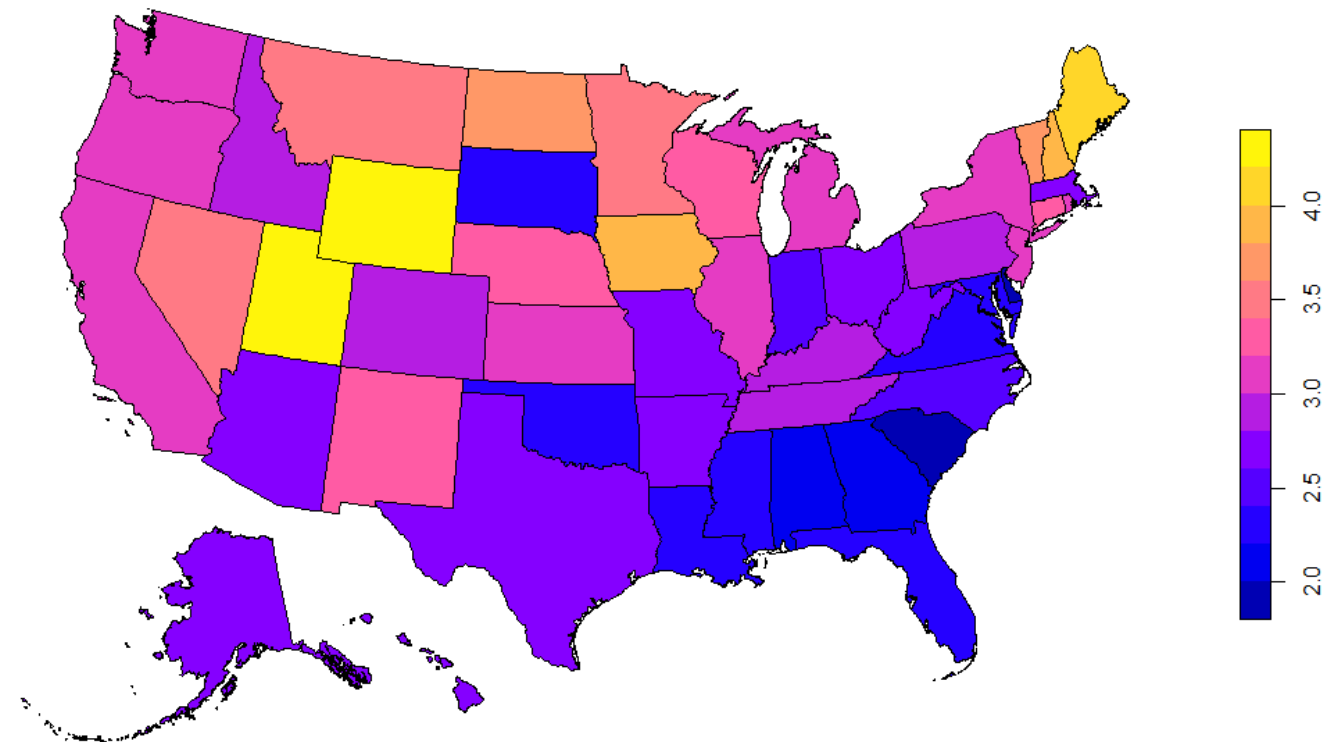

### **Supplementary Figure Legends**

**Supplementary Figure S1.:** Map of states with available data. (A) Last month cannabis use and (B) testicular cancer incidence rates across USA by state for 2017.
